# Supplementary material for: Bioelectronic Nose Based on Single-Stranded DNA and Single-Walled Carbon Nanotube to Identify a Major Plant Volatile Organic Compound (p-Ethylphenol) Released by Phytophthora Cactorum Infected Strawberries
Source: PubMed Central journal article supplement (PMC7153259; doi:10.3390/nano10030479), 2020-03-07
Supplement: nanomaterials-10-00479-s001.pdf [file nanomaterials-10-00479-s001.pdf]

## Supporting Information

# Bioelectronic Nose Based on Single-Stranded DNA and Single-Walled Carbon Nanotube to Identify a Major Plant Volatile Organic Compound (p-Ethylphenol) Released by *Phytophthora Cactorum* Infected Strawberries

Hui Wang <sup>1,2,\*</sup>, Yue Wang <sup>1</sup>, Xiaopeng Hou <sup>2</sup> and Benhai Xiong <sup>1,\*</sup>

<sup>1</sup> State Key Laboratory of Animal Nutrition, Institute of Animal Sciences, Chinese Academy of Agricultural Sciences, Beijing 100193, China; wangyue9313@163.com (Y.W.)

<sup>2</sup> Research Institute of Wood Industry, Chinese Academy of Forestry, Beijing 100091, China; houxiaopeng\_lunwen@163.com (X.H.)

\* Correspondence: wanghui\_lunwen@163.com or wanghuilunwen@cau.edu.cn (H.W.); xiongbenhai@caas.cn (B.X.); Tel.: +86-010-62811680 (B.X.)

Received: 05 February 2020; Accepted: 03 March 2020; Published: date

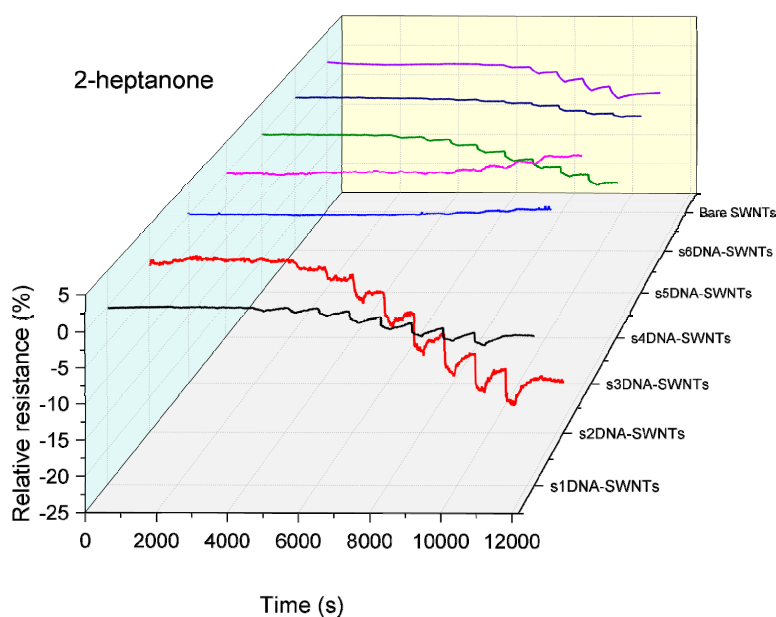

**Figure S1.** The relative resistance of different ssDNA-SWNTs towards different concentrations of 2-heptanone varying from 0.25% to 100%.

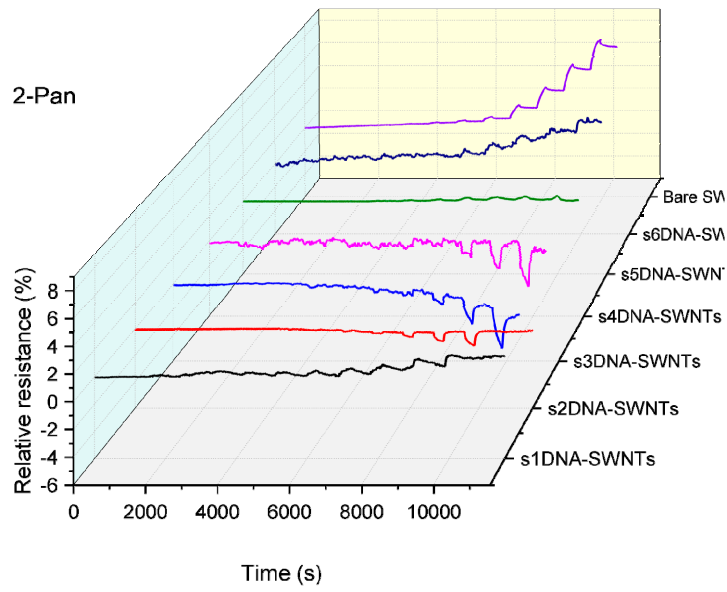

**Figure S2.** The relative resistance of different ssDNA-SWNTs towards different concentrations of 2-pentanone varying from 0.25% to 100%.

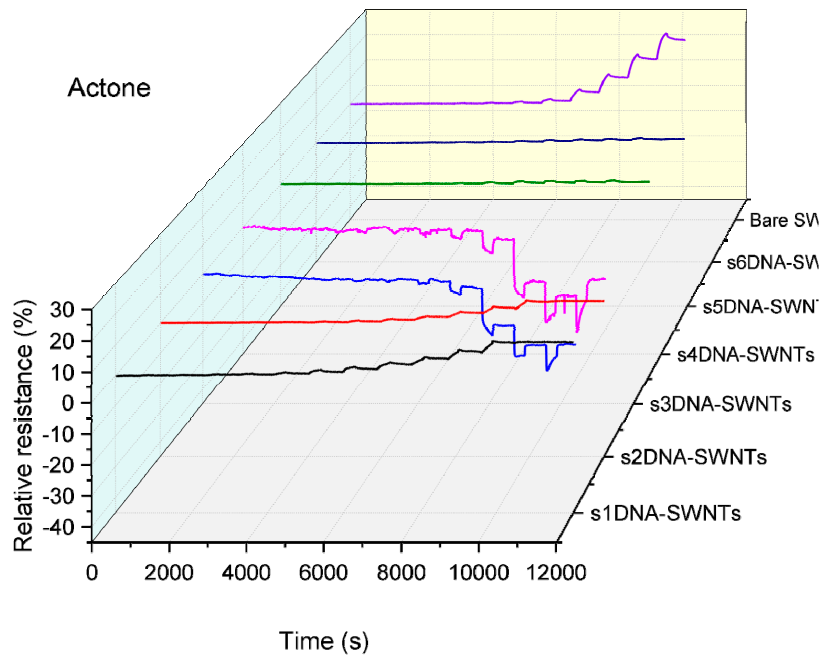

**Figure S3.** The relative resistance of different ssDNA-SWNTs towards different concentrations of actone varying from 0.25% to 100%.

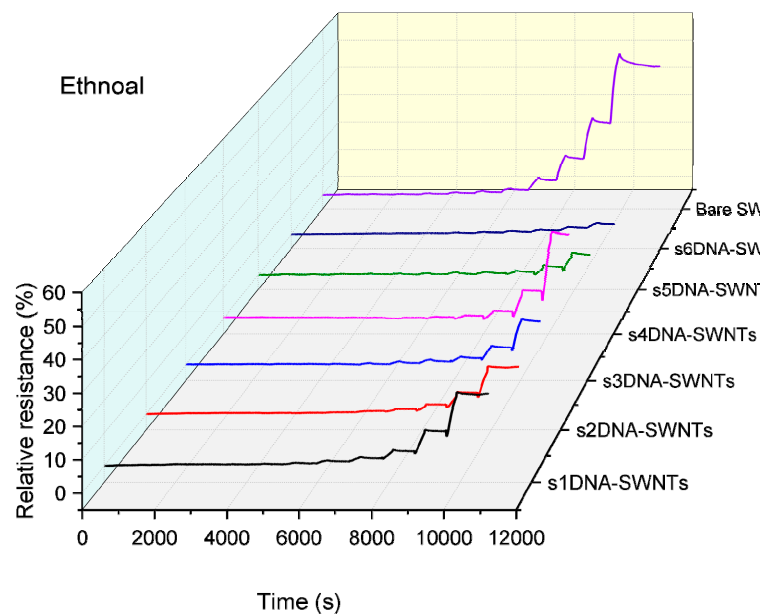

**Figure S4.** The relative resistance of different ssDNA-SWNTs towards different concentrations of ethnoal varying from 0.25% to 100%.

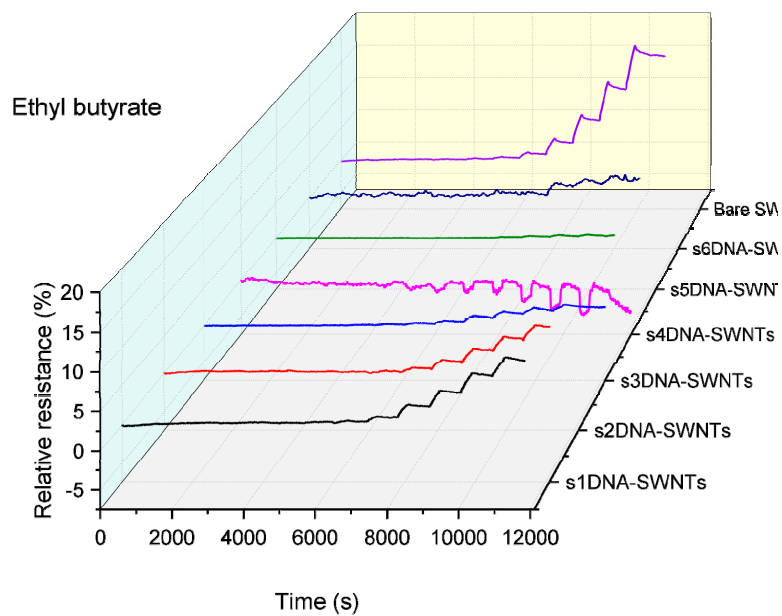

**Figure S5.** The relative resistance of different ssDNA-SWNTs towards different concentrations of ethyl butanoate varying from 0.25% to 100%.

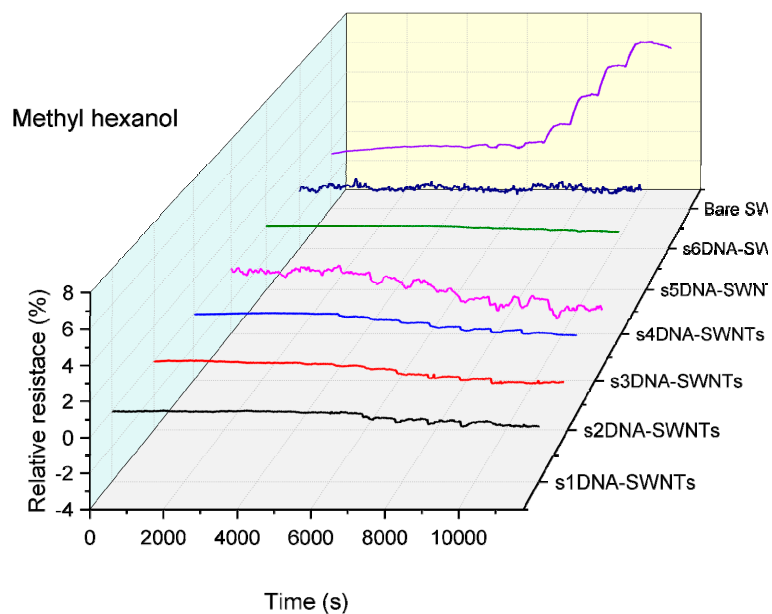

**Figure S6.** The relative resistance of different ssDNA-SWNTs towards different concentrations of methyl hexanoate varying from 0.25% to 100%.

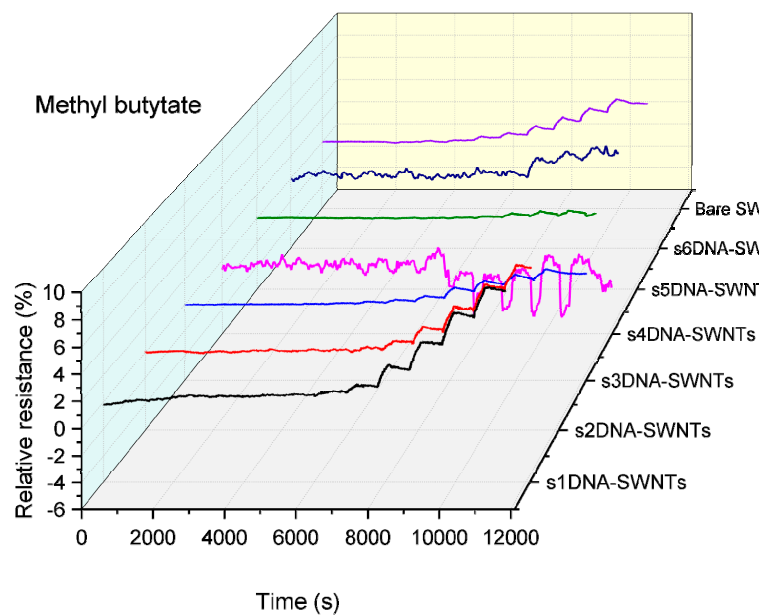

**Figure S7.** The relative resistance of different ssDNA-SWNTs towards different concentrations of methyl butanoate varying from 0.25% to 100%.

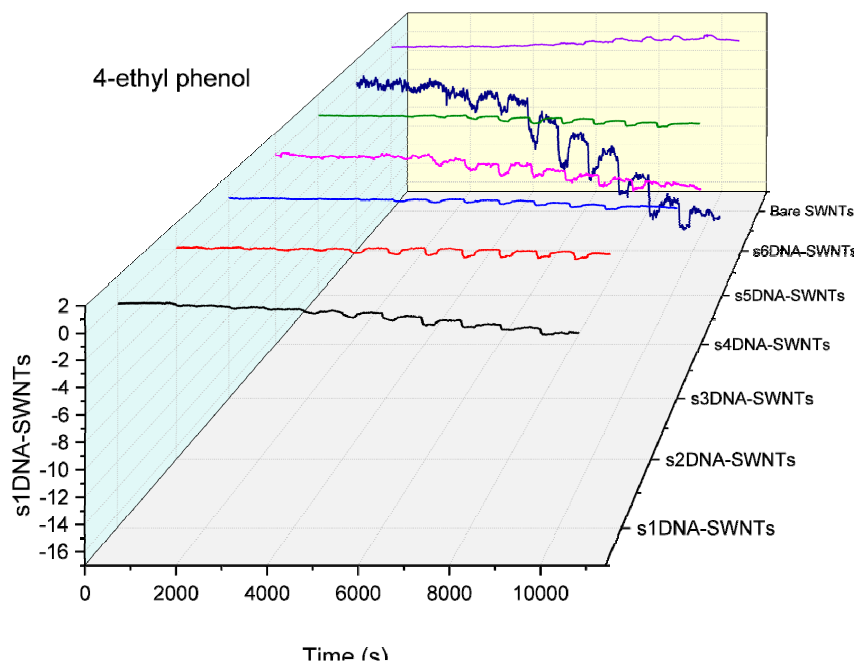

**Figure S8.** The relative resistance of different ssDNA-SWNTs towards different concentrations of 4-ethyl phenol varying from 0.25% to 100%.
